# Supplementary material
Source: PubMed Central journal article supplement (PMC3110027)
Supplement: supp_blood-2010-04-280123_Document1.pdf [file supp_blood-2010-04-280123_Document1.pdf]

**Table S1. COG samples: patient characteristics**

| Sample | Age at dx (in years) | WBC (x10 <sup>3</sup> /μL) | Marrow Blast % | FAB | Cytogenetics                                                                   | Treatment Protocol | Response to Course 1 | Follow-up (days) | Status | Cause of Death | Constit. pStat3 |
|--------|----------------------|----------------------------|----------------|-----|--------------------------------------------------------------------------------|--------------------|----------------------|------------------|--------|----------------|-----------------|
| CBF 1  | 13.2                 | 24.3                       | 51             | M2  | 45,X,-Y,t(8:21)(q22:q22)[14]/46,XY[6]                                          | CCG 2961           | W/D (NR)             | 1569             | Alive  |                | -               |
| CBF 2  | 3.8                  | 19.8                       | 32             | M2  | 45,X,-X,t(8:21)(q22:q22)[19]/46,XX[1]                                          | CCG 2961           | CR                   | 3629             | Alive  |                | -               |
| CBF 3  | 12.9                 | 69.2                       | 73             | M2  | 46,XX,der(7)t(7:9)(q22:q13),t(8:21)(q22:q22),add(9)(q13)[20]                   | CCG 2961           | CR                   | 485              | Dead   | PD             | -               |
| CBF 4  | 15.1                 | 7.9                        | 7              | Unk | 45,X,-Y,t(8:21)(q22:q22)[20]                                                   | AAML03P1           | CR                   | 1634             | Alive  |                | +               |
| CBF 5  | 4.0                  | 5.7                        | 77             | M2  | 46,XX,t(8:21)(q22:q22)                                                         | AAML03P1           | CR                   | 1197             | Alive  |                | -               |
| CBF 6  | 11.1                 | 19.7                       | 85             | M2  | 45,X,-Y,t(8:21)(q22:q22)[18]/46,XY[2]                                          | CCG 2961           | CR                   | 4013             | Alive  |                | -               |
| CBF 7  | 4.2                  | 38                         | 59             | M2  | 46,XY,t(8:16:21)(q22:p11.2:q22)[8]/46, idem,der(9)t(1:9)(q25:q34)[20]/46,XY[2] | CCG 2961           | CR                   | 3754             | Alive  |                | -               |
| CBF 8  | 11.5                 | 31.8                       | 28             | M2  | 46,XX,t(8:21)(q22:q22)[20]                                                     | CCG 2961           | CR                   | 451              | Dead   | Infection      | -               |
| CBF 9  | 11.7                 | 14                         | 72             | M2  | 45,X,-X,t(8:21)(q22:q22)[20]                                                   | CCG 2961           | W/D (CR)             | 2432             | Alive  |                | -               |
| CBF 10 | 16.2                 | 25.4                       | 85             | M2  | 46,XY,t(8:21)(q22:q22)[20]                                                     | CCG 2961           | CR                   | 2319             | Alive  |                | -               |
| NK 1   | 10.5                 | 59.7                       | 98             | M4  | 46,XY[20]                                                                      | CCG 2891           | PR                   | 4631             | Alive  |                | +               |
| NK 2   | 11.1                 | 13.6                       | 40             | M2  | 46,XX[21]                                                                      | CCG 2891           | CR                   | 190              | Dead   | Infection      | +               |
| NK 3   | 3.1                  | 575                        | 33             | M4  | 46,XY[20]                                                                      | CCG 2891           | Fail                 | 321              | Dead   | PD             | +               |
| NK 4   | 4.9                  | 330.7                      | 87             | M2  | 46,XY[20]                                                                      | CCG 2891           | Fail                 | 463              | Dead   | Other          | +               |
| NK 5   | 13.3                 | 29.6                       | 86             | M1  | 46,XX[20]                                                                      | CCG 2891           | CR                   | 843              | Dead   | PD             | +               |
| NK 6   | 9.7                  | 21                         | 68             | M1  | 46,XX[20]                                                                      | CCG 2891           | CR                   | 3352             | Alive  |                | -               |
| NK 7   | 10.8                 | 63.3                       | 66             | M4  | 46,XY[20]                                                                      | CCG 2891           | CR                   | 2944             | Alive  |                | -               |
| NK 8   | 15.0                 | 91.3                       | 61             | M1  | 46,XX[29]/NC[1]                                                                | CCG 2891           | CR                   | 3235             | Alive  |                | -               |

Abbreviations:

FAB - French American British classification

W/D - Withdrawn from study

CR - Complete Response (<5% marrow blasts)

PR - Partial Response (5-25% marrow blasts)

PD - Progressive Disease

NR – No Response

**Table S2. TXCCC samples: patient characteristics**

| <b>Sample</b> | <b>Age at dx (in years)</b> | <b>WBC (x10<sup>3</sup> /μL)</b> | <b>Marrow Blast %</b> | <b>FAB</b> | <b>Cytogenetics</b>                                                                         | <b>Assays Performed</b> |
|---------------|-----------------------------|----------------------------------|-----------------------|------------|---------------------------------------------------------------------------------------------|-------------------------|
| 1861          | 11                          | 122,000                          | 79                    | M2         | 46,XY[20]                                                                                   | Stim; C188-9            |
| 1733          | 1                           | 19,000                           | 90                    | M1         | Near tetraploid with t(2;12)(q33;p13)                                                       | C188-9; CFU             |
| 2187          | 9                           | 71,000                           | 65                    | M4         | 46,XY,t(1;6;11)(q21;q27;q23)[19],46,XY[1]                                                   | Stim; C188-9; CFU       |
| 2053          |                             |                                  |                       |            | Data Not Available                                                                          | Stim                    |
| 3190          | 10                          | 400,000                          | 95                    | M4         | MLL-rearranged by FISH (relapse of #2187)<br>46,XY,der(10)inv(11)(q13q23)t(10;11)(p12;q13), | Stim; C188-9            |
| 3482          | 13                          | 40,000                           | 70                    | M5         | der(11)t(10;11)(p12;q13)[20]                                                                | Stim; CFU               |
| 1436          | 11                          | 528,000                          | 66                    | Unk        | Unknown                                                                                     | C188-9                  |
| 2735          | 7                           | 42,000                           | 84                    | M1         | 46,XY,t(8;21)(q22;q22)[11]                                                                  | C188-9; CFU             |
| 2742          | 3                           | 53,000                           | 79(PB)                | Unk        | 47,X,der(X)t(X;1)(q28;q21),+mar[20]                                                         | CFU                     |

Abbreviations:

FAB - French American British classification

PB – peripheral blood

Unk – unknown

FISH – fluorescence in situ hybridization

Stim – G-CSF stimulation

C188-9 – pStat3 and/or survival inhibition with C188-9

CFU – colony forming unit assay

**Table S3. C188-9 IC<sub>50</sub>s for inhibition of pStat3 in AML cell lines**

| <b>Cell Line</b> | <b>C188-9 IC<sub>50</sub><br/>(<math>\mu</math>M)</b> |
|------------------|-------------------------------------------------------|
| Kasumi-1         | 4.5                                                   |
| THP-1            | 4.8                                                   |
| GDM-1            | 5.0                                                   |
| NB-4             | 8.3                                                   |
| HL-60            | 5.3                                                   |
| KG-1             | 4.1                                                   |

n=4 for Kasumi-1; n=3 for others

**Table S4. C188-9 and JSI-124 EC<sub>50</sub>s for induction of apoptosis in AML cell lines**

| <b>Cell Line</b> | <b>C188-9 EC<sub>50</sub><br/>(<math>\mu</math>M) [n]</b> | <b>JSI-124 EC<sub>50</sub><br/>(<math>\mu</math>M) [n]</b> |
|------------------|-----------------------------------------------------------|------------------------------------------------------------|
| Kasumi-1         | 8.4<br>[5]                                                | 1.2<br>[3]                                                 |
| THP-1            | 15.2<br>[5]                                               | 1.1<br>[3]                                                 |
| GDM-1            | 6.0<br>[4]                                                | 9.5<br>[3]                                                 |
| NB-4             | 20.5<br>[6]                                               | 13.0<br>[3]                                                |
| HL-60            | 34.7<br>[6]                                               | 6.1<br>[3]                                                 |
| KG-1             | 42.8<br>[3]                                               | 6.5<br>[3]                                                 |
| K562             | 43.6<br>[5]                                               | 44.9<br>[3]                                                |

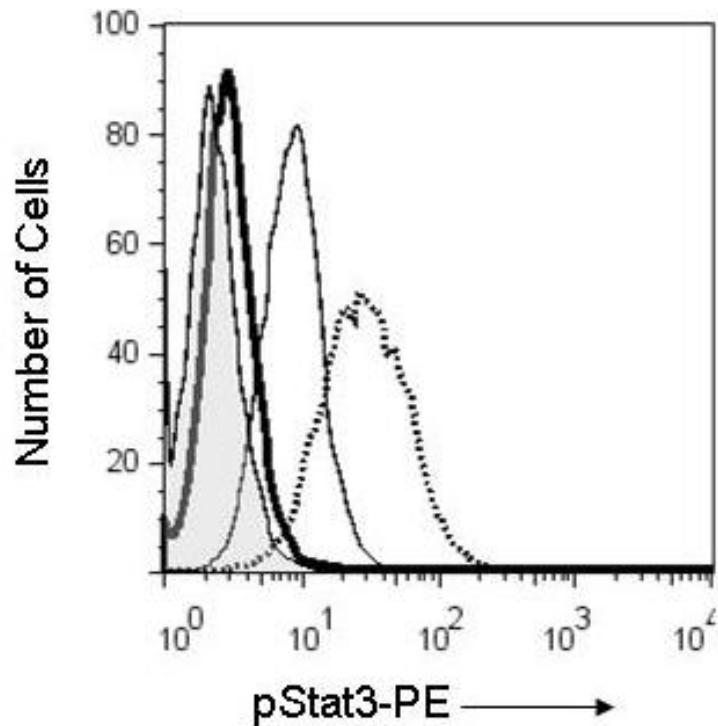

**Figure S1. Immunoreactivity for pStat3 was blocked by the immunizing pY peptide.** THP-1 cells were unstimulated or stimulated with G-CSF (100 ng/ml), then prepared and labeled for FACS analysis. One sample of G-CSF-stimulated cells was labeled with anti-pStat3 antibody that had been pre-incubated for one hour at 4° with the peptide used to develop the antibody (7.5 mg/100 ml reaction). Shaded: isotype control; solid line; unstimulated; dotted line: G-CSF-stimulated; Thick line: peptide-pretreated.
